# Supplementary material for: Tau depletion prevents progressive blood-brain barrier damage in a mouse model of tauopathy
Source: PubMed Central journal article supplement (PMC4353464; doi:10.1186/s40478-015-0186-2), 2015-01-31
Supplement: 40478_2015_186_MOESM1_ESM.pdf [file 40478_2015_186_MOESM1_ESM.pdf]

## Additional File 1

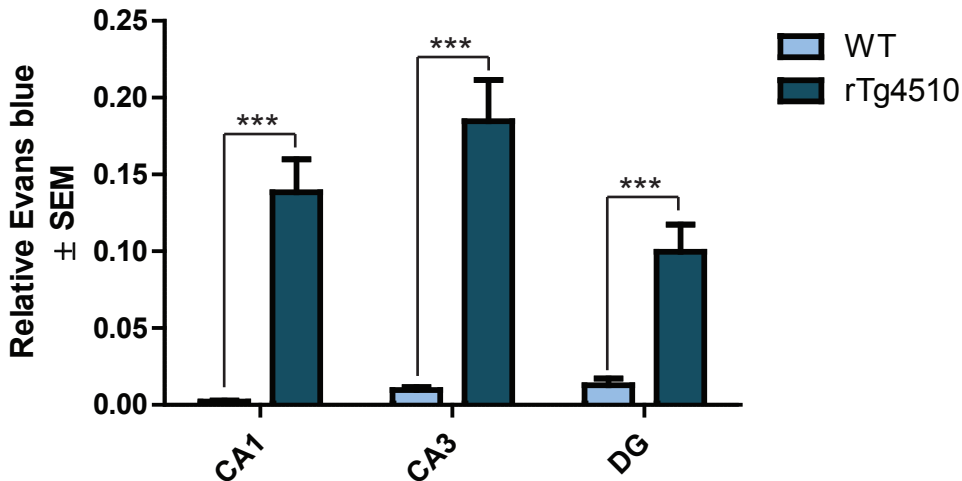

**Figure S1 Evans blue fluorescence in subregions of the hippocampus.** Quantification of EB fluorescence in the CA1, CA3, and dentate gyrus regions of the hippocampus from 12-month old rTg4510 and wild-type mice. \*\*\* $p < 0.001$ .

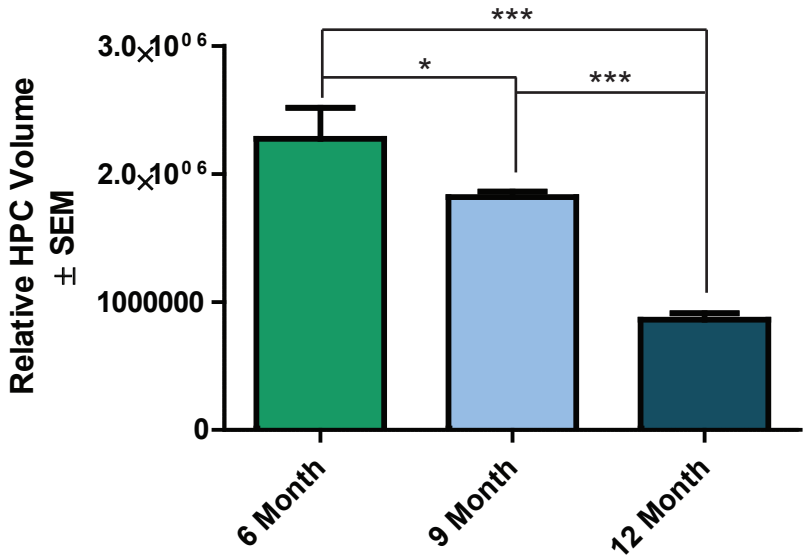

**Figure S2 Hippocampal atrophy with aging in the rTg4510 mouse model.** Quantification of relative hippocampal volume at 6-, 9- and 12-months. \* $p < 0.05$ , \*\*\* $p < 0.001$ .

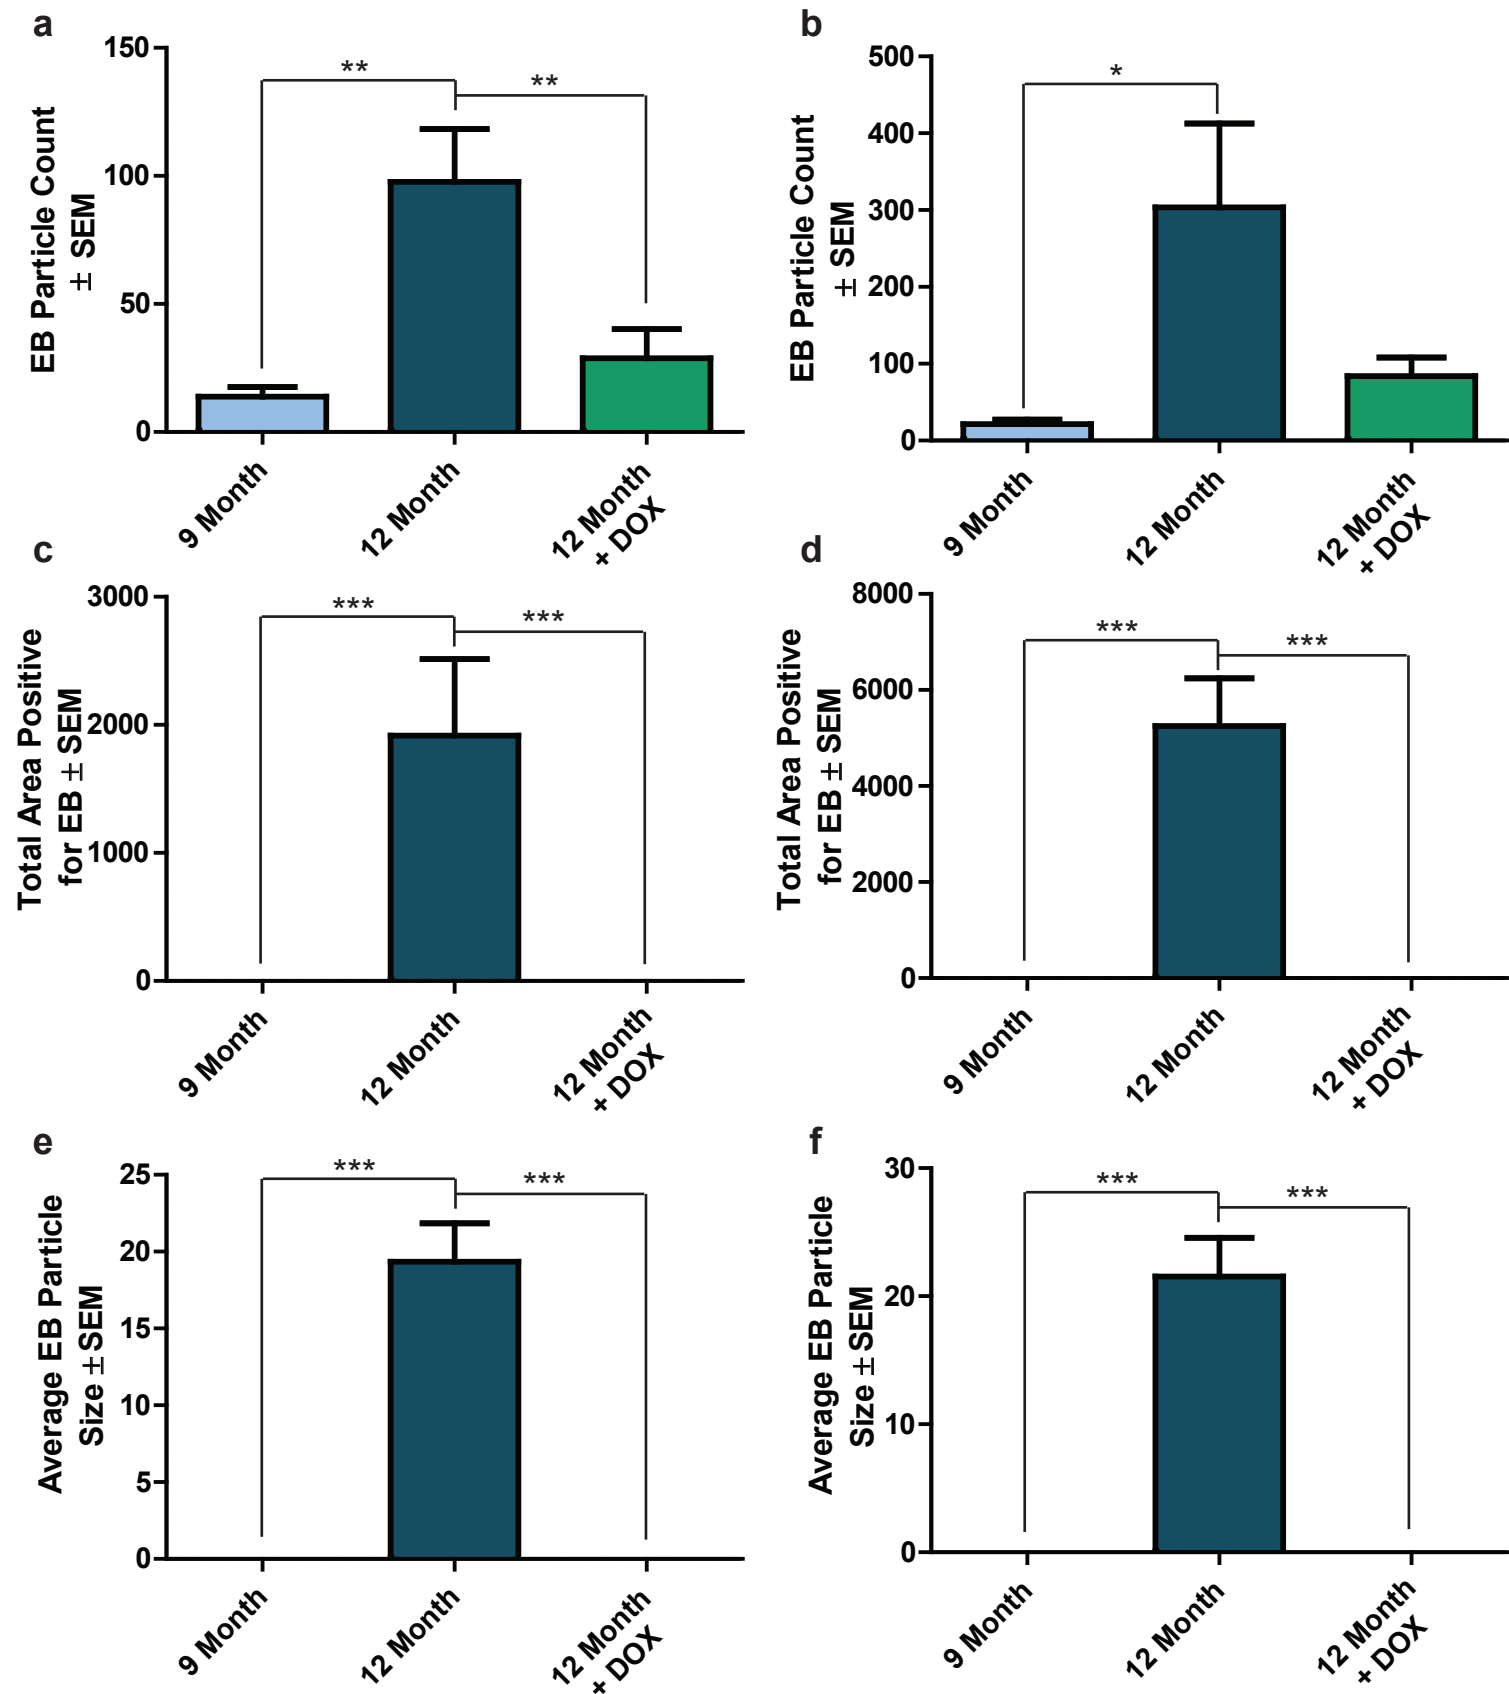

**Figure S3 Additional Evans blue (EB) measurements.** Average count of independent EB positive spots per **a** hippocampus and **b** frontal cortex. \*p<0.05, \*\*p<0.01. Total EB positivity (pixels) in each **c** hippocampus and **d** frontal cortex. \*\*\*p<0.001. Average size of independent EB positive areas per **e** hippocampus and **f** frontal cortex. \*\*\*p<0.001.

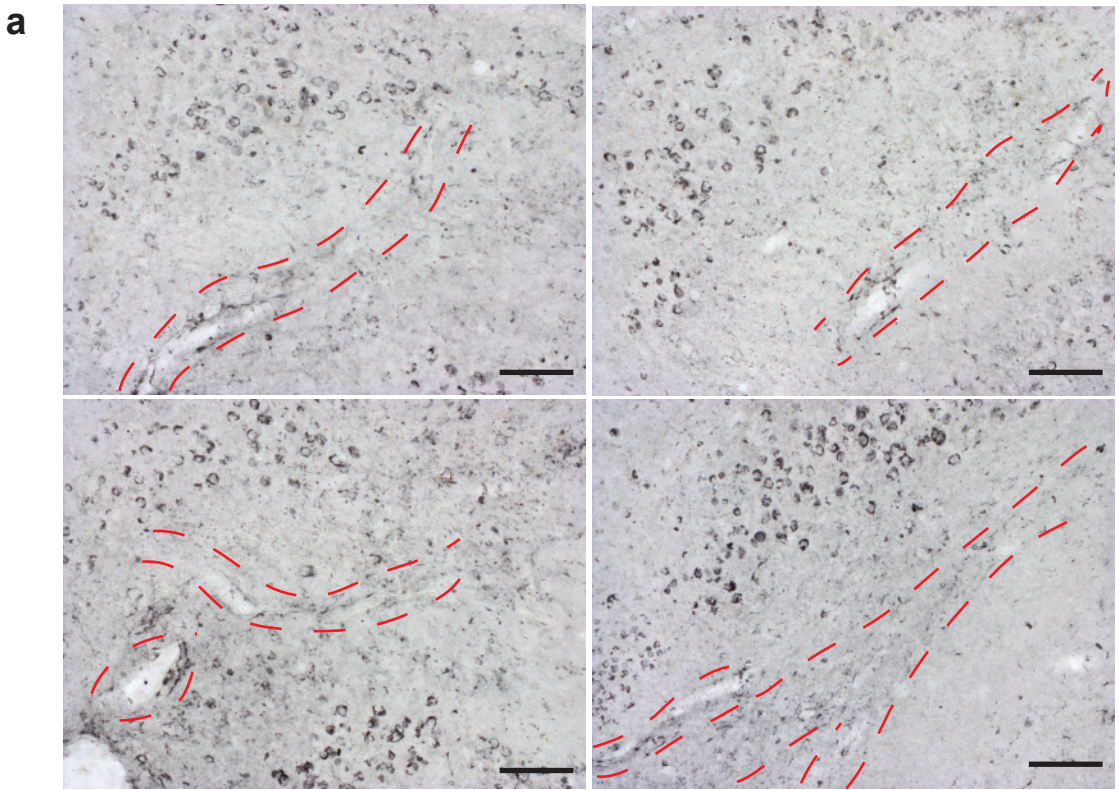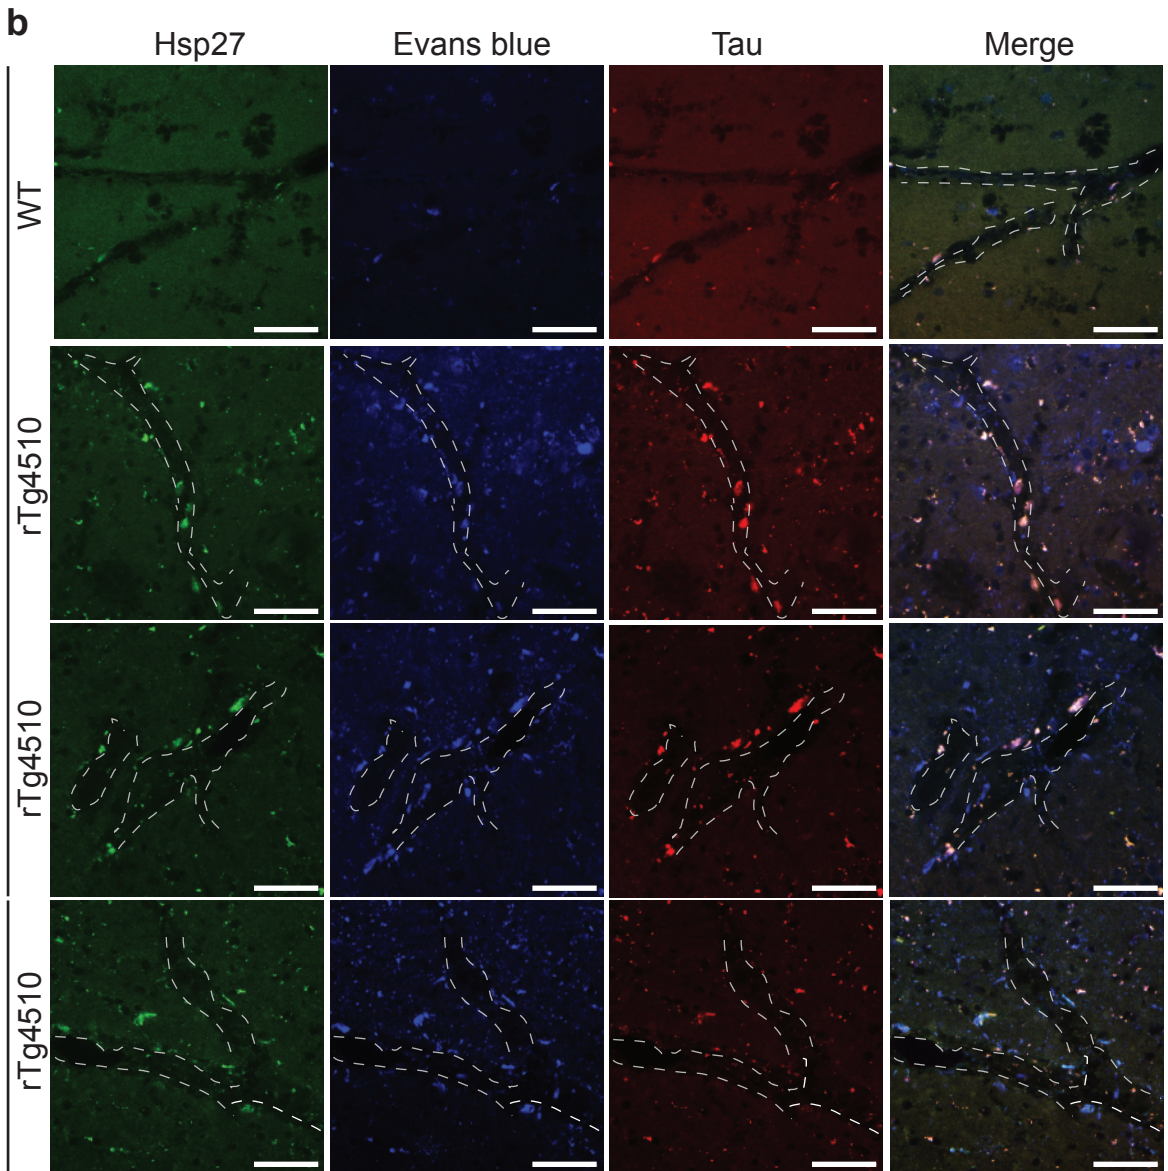

**Figure S4 Perivascular tau is found along the hippocampal blood vessels.**  
**a** Total tau (H-150) reactivity in the hippocampus of 12-month old rTg4510 mice. Images taken at 20x magnification. Scale bar represents 100  $\mu$ m. **b** Representative images of hippocampal blood vessels from 12-month old wild-type, rTg4510 and rTg4510 + DOX stained for Hsp27, tau (v-20), and Evans blue. Images taken at 60x magnification. Scale bar represents 50  $\mu$ m.
